# Supplementary material for: New rapid one-step PCR diagnostic assay for Plasmodium falciparum infective mosquitoes
Source: PubMed Central journal article supplement (PMC5780459; doi:10.1038/s41598-018-19780-6), 2018-01-23
Supplement: 41598_2018_19780_MOESM1_ESM.pdf [file 41598_2018_19780_MOESM1_ESM.pdf]

## **New rapid one-step PCR diagnostic assay for *Plasmodium falciparum* infective mosquitoes**

Mary Kefi<sup>1,2</sup>, Konstantinos Mavridis<sup>1</sup>, Maria L. Simões<sup>3</sup>, George Dimopoulos<sup>3</sup>, Inga Siden-Kiamos<sup>1\*</sup>, John Vontas<sup>1,4</sup>

<sup>1</sup>Institute of Molecular Biology and Biotechnology, Foundation for Research and Technology-Hellas, Heraklion 70013, Greece

<sup>2</sup>Department of Biology, University of Crete, Vassilika Vouton, Heraklion 70013, Greece

<sup>3</sup>W. Harry Feinstone Department of Molecular Microbiology and Immunology, Johns Hopkins Bloomberg School of Public Health, 615 N Wolfe St., Baltimore, MD 21205, USA.

<sup>4</sup>Pesticide Science Laboratory, Department of Crop Science, Agricultural University of Athens, 11855 Athens, Greece

**Table S1.** Primer sequences and main PCR conditions for the thirteen *P. berghei* genes tested.

| Gene            | Forward primer (5'-3') | Reverse primer (5'-3') | Amplicon size gDNA(bp) | Amplicon size transcript (bp) |
|-----------------|------------------------|------------------------|------------------------|-------------------------------|
| <i>Pbuis1</i>   | GGATGGGCAAAGACAAAGAA   | TCACCTATTGTGCTCCACCA   | <b>726</b>             | <b>726</b>                    |
| <i>Pbuis2</i>   | CCCGAGGTAGATGAATTGGA   | GCTCACGGAAGGATCGATAA   | <b>622</b>             | <b>622</b>                    |
| <i>Pbuis4</i>   | CCCATTGATGAGACAAACGA   | ATGCTTCTCAGTGGGGCTA    | <b>415</b>             | <b>415</b>                    |
| <i>Pbuis5</i>   | GGTTGGGAATCAGAACAAGC   | TGCTGAACCCGAACTTAGTG   | <b>870</b>             | <b>870</b>                    |
| <i>Pbuis10</i>  | TGCAGAGGGTACTGTTGACG   | TCGAACCAGCAAATGGTACA   | <b>689</b>             | <b>689</b>                    |
| <i>Pbuis12</i>  | TGCAGAAGACAGCGAATTGT   | TCTTCCCCTTTTCCAACAC    | <b>816</b>             | <b>816</b>                    |
| <i>Pbuis24</i>  | GGAAGGAAAGCAAGGAAAGG   | GGTCCTGTTTGATTGGCAGT   | <b>807</b>             | <b>807</b>                    |
| <i>Pbcsp</i>    | AGCATCCAAGCCCAAAGG     | CCGCGCTTGGGATATAAG     | <b>697</b>             | <b>697</b>                    |
| <i>Pbspect1</i> | AAGCATTGAACCAAAGGAA    | TTTTTGCTTCTCCTTTTCCA   | <b>683</b>             | <b>455</b>                    |
| <i>Pbslarp</i>  | TGAACCCAAATGATCAAGCA   | GAATCGGCACAAGGCACTAT   | <b>874</b>             | <b>773</b>                    |
| <i>Pbgest</i>   | TAATTCCTCGGGAACAAGC    | TTGGTGGCTTCCAATGTTTT   | <b>835</b>             | <b>480</b>                    |
| <i>Pbplp1</i>   | CAAGCGTAGGGGATCTACA    | CTTTCCCCGATGAAGATGAA   | <b>898</b>             | <b>698</b>                    |
| <i>Pbspatr</i>  | CCTGATGTTGGTGCAGACAC   | TCCAATCCGACCAAGGACTA   | <b>793</b>             | <b>457</b>                    |

**Table S2.** Primer sequences and main PCR conditions for the six *P. falciparum* genes tested.

| Gene           | Forward primer (5'-3')      | Reverse primer (5'-3')        | Amplicon size gDNA(bp) | Amplicon size transcript (bp) |
|----------------|-----------------------------|-------------------------------|------------------------|-------------------------------|
| <i>Pfuis4</i>  | ATGAAGGTTTCTAGGCATACCG      | GTCGGATCCATCATTACCT           | <b>278</b>             | <b>278</b>                    |
| <i>Pfuis10</i> | TTTAGCGAGTTTTTCGGAGGA       | CATCAGCGGGGAAATTCCTTA         | <b>865</b>             | <b>865</b>                    |
| <i>Pfuis24</i> | TGTGAATCCTGACGAAGCTG        | GGGCTCCTTGTTGAGCATT           | <b>743</b>             | <b>743</b>                    |
| <i>Pfcsp</i>   | CGGATGGTAATCCTGATCCA        | ACATGGGGACCATTCAAGTTG         | <b>710</b>             | <b>710</b>                    |
| <i>Pfslarp</i> | GAATGATCTTAATTCCAATGAG<br>C | CAGCCCTGGTATATAAATTA<br>CTGTC | <b>1144</b>            | <b>938</b>                    |
| <i>Pfplp1</i>  | AGTGCTGGAGGATCTACTGATG      | CATGTCCAGAACCATGAACA<br>G     | <b>1259</b>            | <b>1027</b>                   |

**Table S3.** MIQE checklist\*

| Category                                                        | Item to be described/detailed                                                   | Location in Manuscript (Page No.)                                               | Comments by Author                                                 |                          |
|-----------------------------------------------------------------|---------------------------------------------------------------------------------|---------------------------------------------------------------------------------|--------------------------------------------------------------------|--------------------------|
| <b>Sample</b>                                                   | Type (blood, etc.)                                                              | Materials and Methods (p 5-6)                                                   |                                                                    |                          |
|                                                                 | Method of dissection/procurement                                                | Materials and Methods (p 5-6)                                                   |                                                                    |                          |
|                                                                 | Processing procedure                                                            | Materials and Methods (p 5-6)                                                   |                                                                    |                          |
|                                                                 | If frozen, how and how quickly?                                                 | Materials and Methods (p 5)                                                     |                                                                    |                          |
|                                                                 | If fixed, with what and how quickly?                                            | -                                                                               | not applicable                                                     |                          |
|                                                                 | Storage conditions and duration                                                 | Materials and Methods (p 5)                                                     |                                                                    |                          |
| <b>Extraction</b>                                               | Method or instrument                                                            | Materials and Methods (p 6-7)                                                   |                                                                    |                          |
|                                                                 | Reagents/kits/modifications                                                     | Materials and Methods (p 6-7)                                                   |                                                                    |                          |
|                                                                 | DNAse or RNAse treatment                                                        | -                                                                               | not applicable, DNA was tested as a template and was not amplified |                          |
|                                                                 | Evidence for lack of contamination (DNA or RNA)                                 | Materials and Methods (p 6-7)                                                   |                                                                    |                          |
|                                                                 | Nucleic acid quantification                                                     | Materials and Methods (p 7)                                                     |                                                                    |                          |
|                                                                 | RNA integrity                                                                   | Materials and Methods (p 7)                                                     |                                                                    |                          |
| <b>Reverse Transcription</b>                                    | Complete reaction conditions, including all components and their concentrations | Materials and Methods (p 6-7) and Table 1                                       |                                                                    |                          |
|                                                                 | RNA amount and reaction volume                                                  | Materials and Methods (p 6-7)                                                   |                                                                    |                          |
|                                                                 | Priming oligo sequence(s)                                                       | Table 1                                                                         |                                                                    |                          |
|                                                                 | Cqs with and without reverse transcriptase                                      | -                                                                               | not applicable, DNA was tested as a template and was not amplified |                          |
| <b>qPCR target</b>                                              | HUGO gene abbreviation                                                          | -                                                                               | not applicable                                                     |                          |
|                                                                 | Sequence accession number                                                       | Materials and Methods (p 7)                                                     |                                                                    |                          |
|                                                                 | Amplicon length                                                                 | Table 1                                                                         |                                                                    |                          |
|                                                                 | <i>In silico</i> specificity (BLAST)                                            | Materials and Methods (p 7)                                                     |                                                                    |                          |
|                                                                 | Location by exon/intron                                                         | Materials and Methods (p 7)                                                     |                                                                    |                          |
|                                                                 | Identify the splice variants amplified                                          | Materials and Methods (p 7)                                                     |                                                                    |                          |
|                                                                 | All primer/probe sequences                                                      | Table 1, Table S1, Table S2                                                     |                                                                    |                          |
|                                                                 | Location and identity of any oligonucleotide modifications                      | Table 1                                                                         |                                                                    |                          |
|                                                                 | <b>qPCR protocol</b>                                                            | Complete reaction conditions, including all components and their concentrations | Materials and Methods (p 7-8)                                      |                          |
|                                                                 |                                                                                 | cDNA/DNA amount and reaction volume                                             | Materials and Methods (p 7-8)                                      | RNA was used as template |
| Instrument identification and complete thermocycling parameters |                                                                                 | Materials and Methods (p 7-8)                                                   |                                                                    |                          |
| <b>qPCR validation</b>                                          | Evidence for PCR specificity (gels, sequencing, or melting curves)              | Table 1 (probe sequences)                                                       | TaqMan chemistry                                                   |                          |
|                                                                 | Template inhibition data (template titrations)                                  | Table 1                                                                         |                                                                    |                          |
|                                                                 | For SYBR Green I reactions, the Cq of the no template control                   | -                                                                               | not applicable                                                     |                          |

|                      |                                                                             |                               |  |
|----------------------|-----------------------------------------------------------------------------|-------------------------------|--|
|                      | Calibration curves with slope and intercept                                 | Table 1                       |  |
|                      | PCR efficiency from the slope                                               | Table 1                       |  |
|                      | r <sup>2</sup> of the calibration curve                                     | Table 1                       |  |
|                      | Evidence for the linear dynamic range                                       | Table 1                       |  |
|                      | Evidence for the limit of detection                                         | Table 1                       |  |
|                      | For multiplexed assays, the efficiency and limit of detection of each assay | Table 1                       |  |
| <b>Data analysis</b> | qPCR analysis method/software                                               | Materials and Methods (p 8)   |  |
|                      | Method of C <sub>q</sub> determination                                      | Materials and Methods (p 8)   |  |
|                      | Results of no template controls                                             | Materials and Methods (p 7-8) |  |
|                      | Justification of number and choice of reference genes                       | Materials and Methods (p 7)   |  |
|                      | Normalization method                                                        | Materials and Methods (p 8)   |  |
|                      | Number and stage (reverse transcription or qPCR) of technical replicates    | Materials and Methods (p 8)   |  |
|                      | Intra-assay variation in terms of concentration, not C <sub>q</sub>         | Table 1                       |  |
|                      | Statistical methods/software                                                | Materials and Methods (p 8)   |  |

\*according to “The MIQE guidelines: minimum information for publication of quantitative real-time PCR experiments. Clin Chem. 2009 Apr;55(4):611-22.”

**Table S4.** Detection of *Pfplp1* and *Pfslarp* genes in mixed populations of infective and non-infected mosquitoes (N=2 biological replicates used for each population).

| Gene           | Population                                         | RQ (Mean ± SE) | Ct (Mean ± SE) |
|----------------|----------------------------------------------------|----------------|----------------|
| <i>Pfplp1</i>  | 1 infective and 9 non-infected mosquitoes (1:10)   | 46.7 ± 1.6     | 25.90 ± 1.0    |
|                | 1 infective and 49 non-infected mosquitoes (1:50)  | 26.4 ± 12      | 26.10 ± 0.87   |
|                | 1 infective and 99 non-infected mosquitoes (1:100) | 21.1 ± 6.0     | 32.8 ± 0.03    |
| <i>Pfslarp</i> | 1 infective and 9 non-infected mosquitoes (1:10)   | 85.0 ± 58      | 25.5 ± 0.22    |
|                | 1 infective and 49 non-infected mosquitoes (1:50)  | 55.0 ± 14      | 26.5 ± 1.0     |
|                | 1 infective and 99 non-infected mosquitoes (1:100) | 29.2 ± 11      | 32.28 ± 0.10   |

Input amount RNA in these experiments was 10x higher than in experiments with pools of 10 mosquitoes.

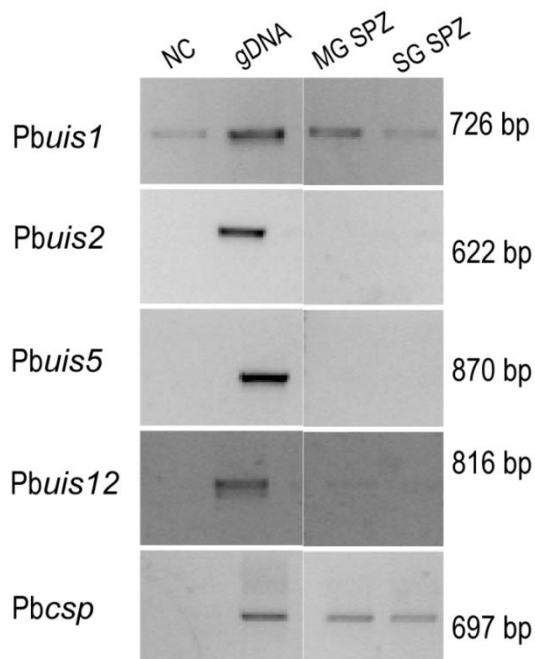

**Figure S1. RT-PCR analysis of *P. berghei* *Pbuis1*, *Pbuis2*, *Pbuis5* and *Pbuis12* transcripts.** Templates were derived from gDNA (lane 2), dissected midguts at 11 d pbm sporozoites (lane 3, MG SPZ) and dissected salivary glands at 21 d pbm (lane 4 SG SPZ). Lane 1 is the negative control without added template (NC). The samples were amplified for 35 cycles. Molecular weight of the amplified fragments is indicated to the right. Unprocessed images of the agarose gels are shown in Supplementary Fig. S4d.

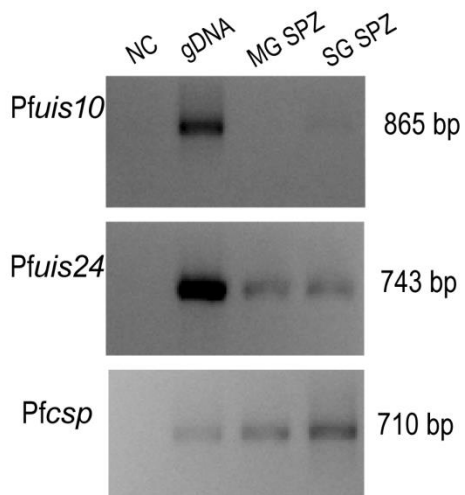

**Figure S2. RT-PCR analysis of *P. falciparum* *Pfuis10* and *Pfuis24* transcripts.** Templates were derived from gDNA (lane 2), dissected midguts 12 d sporozoites (lane 3, MG SPZ) and dissected salivary glands at 21 d pbm (lane 4 SG SPZ). Lane 1 is the negative control without added template (NC). The samples were amplified for 35 cycles. Molecular weight of the amplified fragments is indicated to the right. Unprocessed images of the agarose gels are shown in Supplementary Fig. S4e.

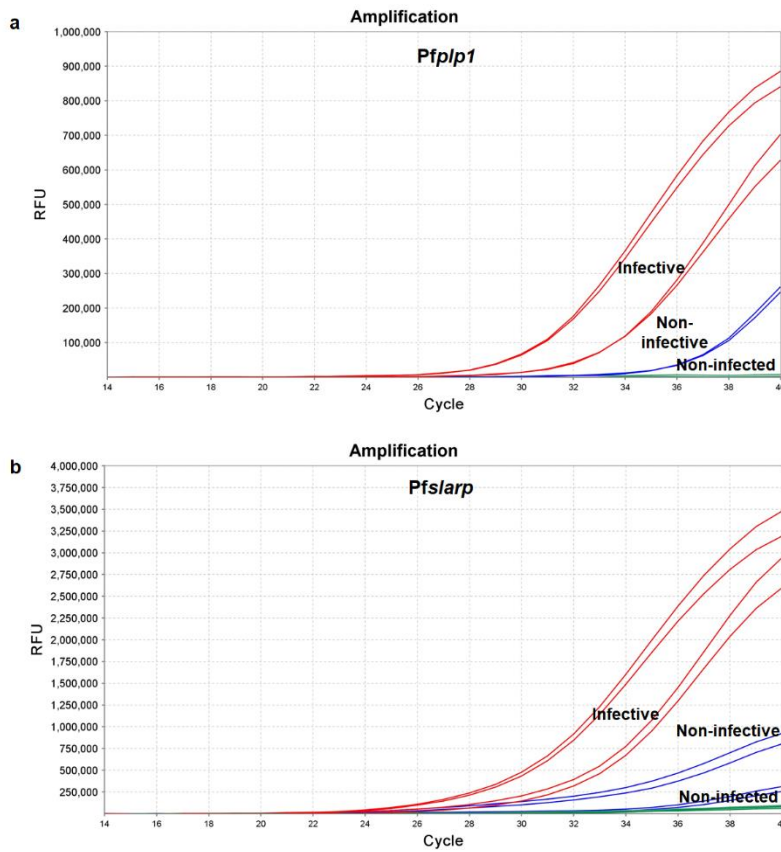

**Figure S3.** Detection of *Pfplp1* (a) and *Pfslarp* (b) expression in single infective (red color) and single non-infective (blue color) mosquitoes. Two different mosquitoes are shown with two technical replicates for each sample. No expression was detected in non-infected mosquitoes (green color).

a.

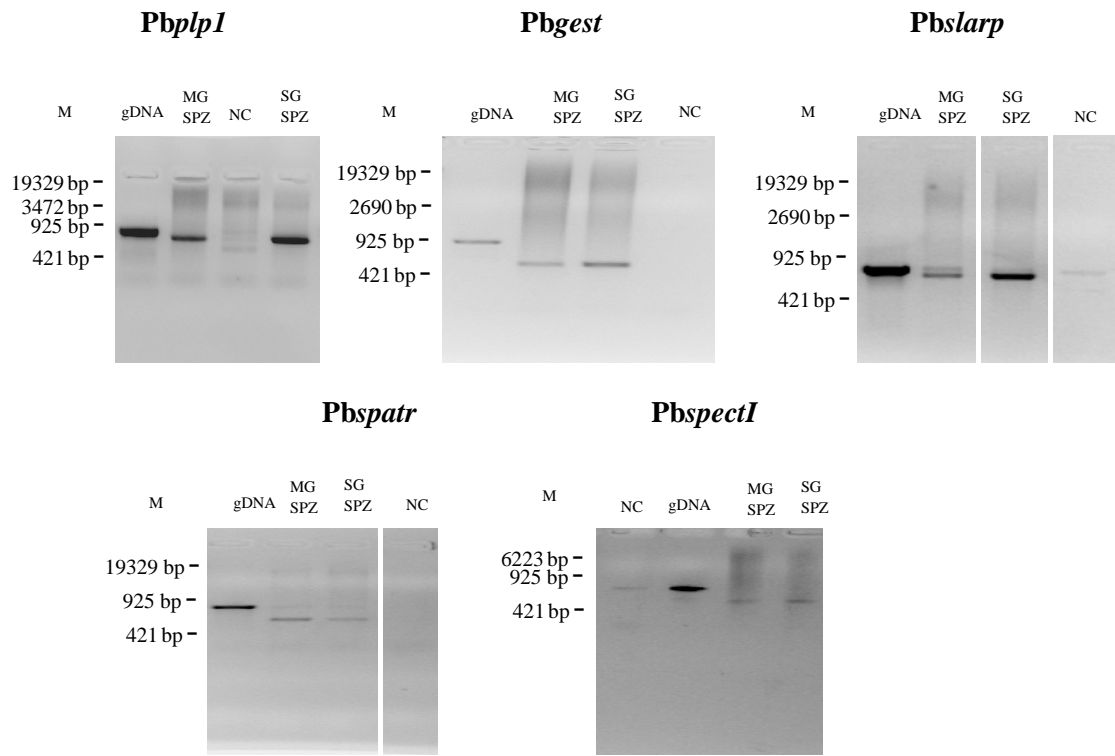

b.

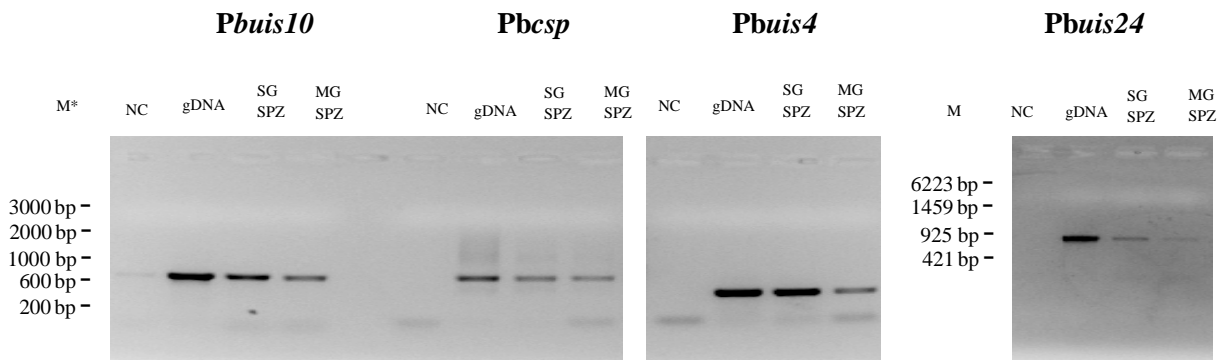

c.

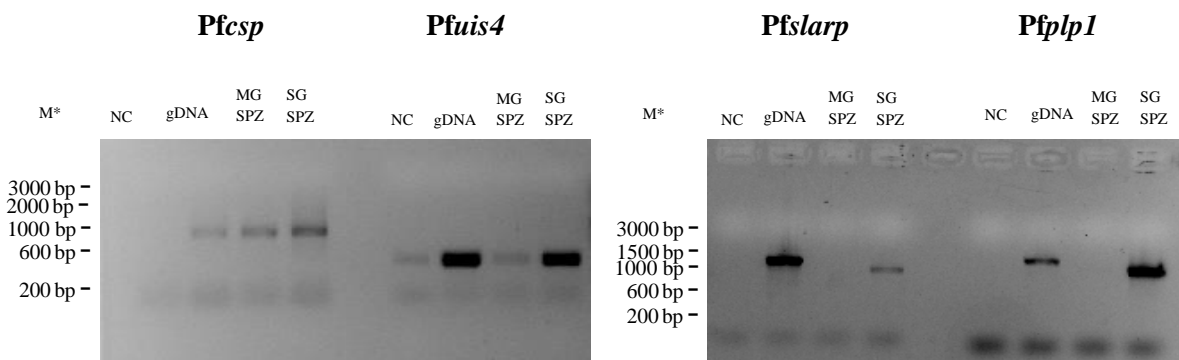

d.



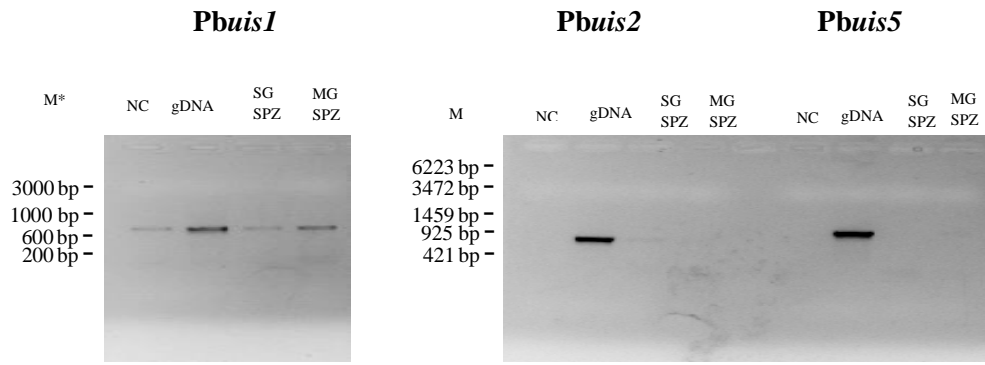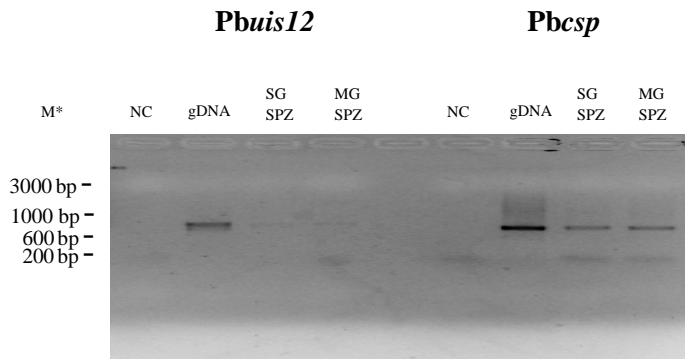

e.

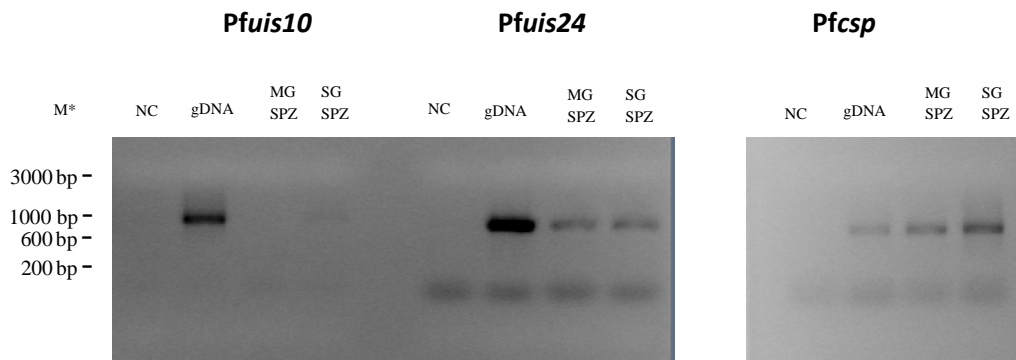

**Fig. S4.** Unprocessed images of agarose gels shown in Figs. 1 (a), 2 (b), 3 (c), and Supplementary Figs. S1 (d) and S2 (e). M: Phage lambda DNA digested with *StyI*, M\*: 100bp DNA ladder.
